# Supplementary material for: Continuous Monitoring of Vital Signs Using Cameras: A Systematic Review
Source: MDPI journal article supplement (doi:10.3390/s22114097), 2022-05-28
Supplement: s1 [file s1]

**Table S1. Extracted information from all articles**

| No | Article | Vital sign       | Database    | No. of subjects       | Male               | Female             | Age (year s)                         | Participant type    | Skin tone               | Settings           | Camera    | Camera details                                                        | Resolution     | Frame rate (fps) | Illumination                | Distance         | Ground truth                                       | Protocol                                                                          |
|----|---------|------------------|-------------|-----------------------|--------------------|--------------------|--------------------------------------|---------------------|-------------------------|--------------------|-----------|-----------------------------------------------------------------------|----------------|------------------|-----------------------------|------------------|----------------------------------------------------|-----------------------------------------------------------------------------------|
| 1  | [12]    | SpO <sub>2</sub> | Self-record | 5                     | 4                  | 1                  | 25-38                                | Healthy             | Fit scale II, III, IV   | Indoor             | RGB       | iPhone X                                                              | -              | 60               | Phone flash light           | 30 cm            | Pulse oximeter, blood pressure cuff                | Sitting comfortably and quietly                                                   |
| 2  | [20]    | HR               | Self-record | 20                    | -                  | -                  | 23-26                                | Healthy             | Light, Brown medium     | Indoor             | RGB       | Webcam                                                                | 720p           | -                | Illumination constant       | 1-3 m            | Ambiotex smart shirt, Fitbit Alta HR               | Stay relax                                                                        |
| 3  | [22]    | HR               | Self-record | 12                    | 12                 | 0                  | -                                    | -                   | -                       | Indoor             | RGB       | Logitech C270                                                         | 640X360        | 30               | -                           | 1 m              | ECG                                                | Stay still, facial expressions                                                    |
|    |         |                  | MAHNOB-HCI  | 30                    | 13                 | 17                 | 26.36 +/- 4.39                       | -                   | -                       | Indoor             | RGB       | Allied Vision Stingray F-046C                                         | 780X580        | 60               | -                           | 40 cm            | ECG                                                | Facial expression and voluntary head motion                                       |
| 4  | [24]    | RR               | Self-record | 17                    | 11                 | 6                  | 5.3 +/- 3.1 weeks                    | Preterm infants     | Indian, Southeast Asian | Indoor             | YUV       | IP camera                                                             | 320X180        | 10               | Various lighting            | 4-6 feet         | ECG impedance pneumography                         | Infants lying in incubator bed                                                    |
| 5  | [25]    | RR               | Self-record | 7                     | 5                  | 2                  | 1-59 days                            | Infants             | -                       | Indoor             | LWIR      | FLIR Lepton 2.5, FLIR lepton 3.5                                      | 60X80, 120X160 | 8.7              | -                           | -                | Philips MX700                                      | Infant sleeping in open bed                                                       |
| 6  | [26]    | RR               | Self-record | 15                    | -                  | -                  | 1-77 days                            | Infants             | -                       | Indoor             | RGB, LWIR | IDS UI-2220SE; FLIR Lepton 2.5                                        | 576*768; 60*80 | 20, 8.7          | -                           | -                | Philips patient monitor MX800                      | Infants lying in bed                                                              |
| 7  | [27]    | RR               | Self-record | 12 adult, 8 newborn   | 7 adult, 6 newborn | 5 adult, 2 newborn | 21-31 adult, Newborn: 27 +/- 19 days | Healthy             | -                       | Indoor             | LWIR      | VarioCAM HD head 820 S/30 mm (InfraTec GmbH)                          | 1024X768       | 30               | -                           | 2 m              | piezo plethysmography, surface ECG                 | Adult: sit normally, simulated breathing. Infant: lying in bed                    |
| 8  | [29]    | RR               | Self-record | 27                    | 18                 | 9                  | 48.6-74.3                            | ICU patients        | -                       | Indoor             | LWIR      | Optrics PI 450                                                        | 382X288        | 80               | -                           | > 1 m, 0.4-0.6 m | Manual counting                                    | Lying in supine position                                                          |
| 9  | [31]    | RR               | Self-record | 20                    | 19                 | 1                  | 68.9± 11.2                           | Anesthesia Patients | -                       | Indoor             | Thermal   | FLIR T-420                                                            | 320X240        | 10               | -                           | 50 cm            | BP, HR, Pulse oximeter, Respiratory volume monitor | Lying in bed and observed before and after midazolam dosage                       |
| 10 | [32]    | RR               | Self-record | 16                    | 6                  | 10                 | 25-37                                | Healthy             | -                       | Indoor             | LWIR      | Seek Thermal Compact PRO for iPhone                                   | 640X480        | 17               | No light                    | 100 cm           | Go direct respirator belt                          | Sleeping                                                                          |
| 11 | [36]    | HR               | Self-record | In lab: 12; In-car: 1 | 9                  | 3                  | 20-40                                | Healthy             | varying                 | Indoor and outdoor | RGB, NIR  | FLIR Backfly BFLY-U3-23S6C-C, Point Grey Grasshopper GS3-U3-41C6NIR-C | 640X640        | 30               | NIR light and ambient light | -                | Pulse oximeter                                     | In-lab: Sit still, but to allow for natural head motion; In-car: passenger in car |
| 12 | [37]    | BP               | Self-record | 5                     | 5                  | 0                  | 27.0± 9.5                            | Healthy             | -                       | Indoor             | RGB       | Imaging source DFK33UX252                                             | 640X480        | 60               | White LED (800 lux)         | 33 cm            | Sphygmomanometer                                   | Pedaling exercise                                                                 |
| 13 | [39]    | HR               | Self-record | 24                    | 13                 | 11                 | 23-38                                | Healthy             | Western European        | Indoor             | RGB       | Logitech c920                                                         | 1280*720       | 30               | Ambient, screen light       | 60 cm            | ECG                                                | Rest, stress test                                                                 |

|    |      |           |                      |     |    |    |                |                                                                                     |                                            |         |                      |                                                            |                                                         |                      |                                                                                                           |                                     |                                                                         |                                                                                   |
|----|------|-----------|----------------------|-----|----|----|----------------|-------------------------------------------------------------------------------------|--------------------------------------------|---------|----------------------|------------------------------------------------------------|---------------------------------------------------------|----------------------|-----------------------------------------------------------------------------------------------------------|-------------------------------------|-------------------------------------------------------------------------|-----------------------------------------------------------------------------------|
| 14 | [40] | HRV       | Self-record          | 136 | 57 | 79 | 24.33<br>±8.62 | Healthy                                                                             | -                                          | In-door | RGB                  | Canon VIXIA<br>HF R62                                      | -                                                       | 60                   | LED light                                                                                                 | 60-90<br>cm                         | ECG                                                                     | Sitting naturally and watching<br>cloud video                                     |
| 15 | [43] | HR,<br>RR | Self-record          | 25  | 15 | 10 | 20-30          | Healthy                                                                             | Fitz scale<br>I-VI                         | In-door | RGB                  | Smartphone LG<br>G2                                        | -                                                       | 30                   | Flash light                                                                                               | ~0.5 m                              | HR: pulse oxi-<br>meter, RR:<br>Manual in-<br>spection                  | Stay still with minimal move-<br>ments                                            |
| 16 | [49] | HRV       | Self-record          | 50  | 39 | 11 | Mean<br>27     | Healthy                                                                             | -                                          | In-door | RGB                  | iPhone 6                                                   | -                                                       | 240                  | Flash light                                                                                               | -                                   | ECG                                                                     | Sit relaxed position                                                              |
| 17 | [51] | HR,<br>RR | Self-record          | 12  | 8  | 4  | 23-34          | Healthy                                                                             | Asians,<br>Africans<br>and Cau-<br>casians | In-door | NIR                  | Monochromatic<br>infrared camera                           | 640X240                                                 | 62                   | Infrared LED                                                                                              | varied                              | Pulse oxime-<br>ter, respiratory<br>belt                                | Seated at a desk naturally and<br>breathe spontaneously at light and<br>dark room |
| 18 | [52] | RR        | Sleeping<br>dataset, | 12  | 10 | 2  | 21-38          | -                                                                                   | -                                          | In-door | NIR,<br>ther-<br>mal | Thermal imager<br>MAG62                                    | 640X480                                                 | -                    | Dark environ-<br>ment                                                                                     | 1-3 m                               | Manual                                                                  | Sleeping                                                                          |
|    |      |           | Self-record          | 11  | -  | -  | -              | -                                                                                   | -                                          |         | NIR                  | Avigilon H4<br>HD Dome                                     | -                                                       | -                    |                                                                                                           | 2.87-3 m                            | Manual count<br>using counter<br>app                                    | Sleeping                                                                          |
| 19 | [53] | HR,<br>RR | Self-record          | 50  | 30 | 20 | 18-85          | Subjects<br>with hy-<br>pertension, my-<br>asthenia<br>gravis,<br>and dia-<br>betes | -                                          | In-door | NIR                  | Point Grey Fire-<br>fly MV                                 | 640X480                                                 | 30                   | Infrared light                                                                                            | 1.5 m                               | Polysomnog-<br>raphy, ECG,<br>Inductance<br>plethysmogra-<br>phy        | Sleeping                                                                          |
| 20 | [55] | HR        | Self-record          | 20  | 17 | 3  | 20's-<br>60's  | -                                                                                   | -                                          | In-door | RGB,<br>NIR          | dual CCD RGB-<br>NIR camera<br>AD-130GE                    | 1296X964                                                | 30                   | Fluorescent<br>light, NIR<br>LED light for<br>NIR wave-<br>lengths, com-<br>puter screen<br>illumination. | 1.5 m                               | Contact PPG<br>sensor                                                   | Sit still in the chair and watching<br>movie                                      |
| 21 | [56] | RR        | Self-record          | 6   | -  | -  | -              | -                                                                                   | -                                          | In-door | RGB                  | Canon camera                                               | -                                                       | -                    | Well-lit illumi-<br>nation                                                                                |                                     | PPG sensor,<br>Respiratory<br>belt                                      | Sit rest with motions and expres-<br>sions                                        |
| 22 | [57] | HR,<br>RR | Self-record          | 20  | 13 | 7  | 27.85<br>±6.9  | Healthy                                                                             | -                                          | In-door | MWIR                 | Infratec Im-<br>ageIR 9300                                 | 1024X768                                                | 50                   | -                                                                                                         | 1.5 m                               | piezoplethys-<br>mography, In-<br>telliVue MP70<br>patient moni-<br>tor | Sit still, sit side 90 degree and still<br>as possible                            |
| 23 | [59] | HR        | Self-record,         | 15  | 13 | 2  | 22-25          | -                                                                                   | Asian                                      | In-door | RGB                  | GoProHERO6<br>Black                                        | 2704X1520                                               | 30                   | Natural sun-<br>light                                                                                     | 0.5, 1,<br>1.5, 2,<br>2.5, 3.0<br>m | ECG                                                                     | Sit stationary                                                                    |
|    |      |           | UBFC-<br>rPPG        | 42  | -  | -  | -              | -                                                                                   | -                                          | In-door | RGB                  | Logitech<br>C920HD pro                                     | 640X480                                                 | 30                   | Sunlight with<br>ambient illu-<br>mination                                                                | 1 m                                 | Pulse oximeter<br>finger clip sen-<br>sor                               | Sitting with Rigid and non-rigid<br>motion, mathematical game                     |
| 24 | [60] | RR        | Self-record          | 30  | 13 | 17 | 27±3           | Healthy                                                                             | Fitz scale:<br>I-V                         | In-door | NIR,<br>FIR          | NIR:<br>see3cam_CU40,<br>FIR: FLIR lep-<br>ton version 3.5 | NIR:<br>336X190<br>pixels,<br>FIR:<br>160X120<br>pixels | NIR: 15,<br>FIR: 8.7 | NIR LED ar-<br>ray                                                                                        | -                                   | Piezo resistive<br>based respira-<br>tor belt                           | Lay in bed in supine position and<br>breath through nose at dark room             |

|    |      |     |             |     |                       |                       |       |         |                                                                                     |        |          |                                                                        |                                                         |                  |                          |            |                                    |                                                                                                         |
|----|------|-----|-------------|-----|-----------------------|-----------------------|-------|---------|-------------------------------------------------------------------------------------|--------|----------|------------------------------------------------------------------------|---------------------------------------------------------|------------------|--------------------------|------------|------------------------------------|---------------------------------------------------------------------------------------------------------|
| 25 | [61] | BST | Self-record | 596 | IRT1: 215, IRT-2: 212 | IRT1: 329, IRT-2: 328 | 18+   | Healthy | white, Black/african-american, Hispanic/Latino, Asian, Multiracial, American Indian | Indoor | RGB, IRT | RGB: Logitech webcam C920, IR-1: FLIR A325sc, IR-2: FLIR 8640 P-series | RGB: NA; IRT-1: 320*240, IRT-2: 640*512 pixels          | 30               | Ambient light            | 0.6-0.8 m  | Oral thermometer                   | Sit Infront of the camera                                                                               |
| 26 | [75] | HR  | MMSE-HR     | 40  | 17                    | 23                    | 18-66 | -       | -                                                                                   | Indoor | RGB      | Di3D dynamic imaging system                                            | 1040X1392                                               | 25               | -                        | -          | ECG                                | Emotion variance                                                                                        |
| 27 | [76] | HR  | MAHNOB-HCI  | 27  | 12                    | 15                    | 19-40 | -       | -                                                                                   | Indoor | RGB      | Allied Vision Sting-ray F-046C                                         | 780X580                                                 | 61               | -                        | 40 cm      | ECG                                | Emotion elicitation                                                                                     |
| 28 | [77] | HR  | MAHNOB-HCI  | 27  | 12                    | 15                    | 19-40 | -       | -                                                                                   | Indoor | RGB      | Allied Vision Sting-ray F-046C                                         | 780X580                                                 | 60               | -                        | 40 cm      | ECG                                | Emotion elicitation and implicit tagging data                                                           |
|    |      |     | Self-record | 40  | 28                    | 12                    | 18-60 | -       | -                                                                                   | Indoor | RGB      | Logitech C920                                                          | 640X480                                                 | 30               | Ambient light            | 50 cm      | ECG                                | Static – motionless and expressionless, dynamic – turns head and changed the expressions                |
| 29 | [78] | HR  | PFF         | 13  | -                     | -                     | -     | Healthy | -                                                                                   | Indoor | RGB      | Nikon D5300                                                            | 1280X720                                                | 50               | Fluorescent lamp         | 0.5 m      | Two Mio Alpha II wrist HR monitor  | Sit still with lights on and off, movements with lights on and off, riding exercise bike with lights on |
|    |      |     | PURE        | 10  | 8                     | 2                     | -     | -       | -                                                                                   | Indoor | RGB      | evo274CVGE                                                             | 640X480                                                 | 30               | Daylight through window  | -          | Contact PPG sensor                 | stay still, talking, slow translation, fast translation, small rotation, medium rotation,               |
|    |      |     | MAHNOB-HCI  | 27  | 12                    | 15                    | 19-40 | -       | -                                                                                   | Indoor | RGB      | Allied Vision Sting-ray F-046C                                         | 780X580                                                 | 60               | -                        | 40 cm      | ECG                                | Facial expression and voluntary head motion                                                             |
|    |      |     | VIPL-HR     | 107 | 79                    | 28                    | 22-41 | -       | -                                                                                   | Indoor | RGB, NIR | 1) Logitech C310, 2) RealSense F200, 3) HUAWEI P9                      | 1)960X420 2)640X480 (NIR); 1920X1080 (RGB) 3) 1920X1080 | 1)25, 2)30, 3)30 | Filament lamp            | 1 m, 1.5 m | Pulse oximeter                     | Head movements, illumination variations                                                                 |
| 30 | [79] | HR  | PURE        | 10  | 8                     | 2                     | -     | -       | -                                                                                   | Indoor | RGB      | Evo274CVGE                                                             | 640X480                                                 | 30               | Day light through window | -          | Contact PPG sensor                 | stay still, talking, slow translation, fast translation, small rotation, medium rotation                |
| 31 | [80] | HR  | MMSE-HR     | 40  | 17                    | 23                    | 18-66 | -       | -                                                                                   | Indoor | RGB      | Di3D dynamic imaging system                                            | 1040X1392                                               | 25               | Asymmetric light         | -          | ECG, blood pressure - Biopac MP150 | Emotional reactions                                                                                     |
|    |      |     | PURE        | 10  | 8                     | 2                     | -     | -       | -                                                                                   | Indoor | RGB      | Evo274CVGE                                                             | 640X480                                                 | 30               | Day light through window | -          | Pulse oximeter                     | stay still, talking, movement                                                                           |
| 32 | [81] | HR  | Self-record | 65  | 34                    | 31                    | -     | -       | -                                                                                   | Indoor | RGB      | Logitech webcam C270                                                   | 640X480                                                 | 30               | -                        | -          | Pulse oximeter                     | Natural facial movements and head pose variations                                                       |

|    |      |     |                    |     |    |    |            |         |                                                                             |        |          |                                                                          |                    |       |                                                        |                           |                                      |                                                                                           |
|----|------|-----|--------------------|-----|----|----|------------|---------|-----------------------------------------------------------------------------|--------|----------|--------------------------------------------------------------------------|--------------------|-------|--------------------------------------------------------|---------------------------|--------------------------------------|-------------------------------------------------------------------------------------------|
|    |      |     | COHFACE            | 40  | 28 | 12 | 35.6±11.47 | Healthy | -                                                                           | Indoor | RGB      | Logitech C525                                                            | 640X480            | 20    | Studio lighting & sunlight                             | -                         | PPG sensor, Respiratory belt         | sit still with varying illumination (studio and natural lighting)                         |
| 33 | [82] | HR  | MMSE-HR            | 40  | 17 | 23 | 18-66      | -       | -                                                                           | Indoor | RGB      | Di3D dynamic imaging system                                              | 1040X1392          | 25    | -                                                      | -                         | ECG                                  | Facial expression                                                                         |
| 34 | [83] | HR  | FAVIP dataset      | 15  | 12 | 3  | 23-45      | -       | Varying skin complexion                                                     | Indoor | RGB      | Samsung galaxy S3, iPhone 3GS                                            | 1280X720           | 30    | -                                                      | 6 inches, 1 foot, 2 feet  | Pulse oximeter                       | Sitting normally with varying distance                                                    |
| 35 | [84] | HR  | Self-record        | 18  | -  | -  | -          | -       | -                                                                           | Indoor | RGB-NIR  | JAI AD-130GE                                                             | 1296X966           | 30    | NIR flash                                              | -                         | Pulse oximeter                       | Sit still                                                                                 |
|    |      |     | Tokyo Tech dataset | 9   | 8  | 1  | 20s-60s    | -       | -                                                                           | Indoor | RGB-NIR  | RGB-NIR sensor                                                           | 640X480            | 30    | KINOFLO lights, NIR lights                             | 1.5 m                     | Contact PPG sensor                   | Relax, exercise-handgrip exercise, relax                                                  |
|    |      |     | MR-NIRP dataset    | 8   | 6  | 2  | 20-40      | Healthy | Indian, Caucasian, Asian                                                    | Indoor | RGB, NIR | Point Grey Flea3 FL3-U3-13E4C-C, Point Grey Grasshopper GS3-U3-41C6NIR-C | 640X640            | 30    | Ambient overhead lights                                | -                         | Finger pulse oximeter                | Sit still and motion task                                                                 |
|    |      |     | UBFC-rPPG          | 47  | -  | -  | -          | -       | -                                                                           | Indoor | RGB      | Logitech C920 HD pro                                                     | 640X480            | 30    | Sunlight and indoor illumination                       | 1 m                       | Pulse oximeter finger clip sensor    | Sitting with playing mathematical game                                                    |
| 36 | [85] | PRV | MMSE dataset       | 140 | 58 | 82 | 18-66      | -       | Europeans, Middle Easterners, South Asians, South Americans and East Asians | Indoor | RGB      | 3D dynamic imaging system, FLIR A655sc Longwave infrared camera          | 1040X1392, 640X480 | 25    | Symmetric lights                                       | -                         | Contact PPG sensor                   | Sitting with varying facial movements                                                     |
| 37 | [86] | HR  | COHFACE            | 40  | 28 | 12 | 35.6±11.47 | Healthy | -                                                                           | Indoor | RGB      | Logitech HD C525                                                         | 640X480            | 20    | Well-lit and natural                                   | -                         | PPG sensor, Respiratory belt         | sit still with varying illumination (studio and natural lighting)                         |
|    |      |     | UBFC-rPPG          | 42  | -  | -  | -          | -       | -                                                                           |        |          | Logitech C920 HD Pro                                                     | 640X480            | 30    | Varying indoor light and sunlight                      | 1 m                       | Pulse oximeter                       | Mathematical game                                                                         |
|    |      |     | PURE               | 10  | 8  | 2  | -          | -       | -                                                                           |        |          | eco274CVGE                                                               | 640X480            | 30    | Daylight through window                                | -                         | Pulse oximeter                       | Sit still, Motion, moves the head, rotation of head                                       |
| 38 | [87] | HR  | Self-record        | 45  | -  | -  | 21-63      | Healthy | Fair, Brown, Black                                                          | Indoor | RGB      | Bayer mosaic                                                             | 1080X1920          | 30    | Fluorescent light (340-380 lx, 430-470 lx, 510-550 lx) | 80 cm (500, 700, 1000 cm) | Pulse oximeter                       | Human computer interaction, Health monitoring scenario                                    |
|    |      |     | MAHNOB-HCI         | 27  | 12 | 15 | 19-40      | -       | -                                                                           | Indoor | RGB      | Allied Vision Sting-ray F-046C                                           | 780X580            | 61    | -                                                      | 40 cm                     | ECG                                  | Emotion elicitations                                                                      |
| 39 | [89] | RR  | Self-record        | 20  | -  | -  | -          | Healthy | -                                                                           | Indoor | RGB      | Logitech C922 Pro / GigE Sony XCG-C30C                                   | 1280X720 / 659X494 | 60/60 | -                                                      | 0.5-1 m                   | Pulse oximeter, respiratory belt     | Sit still with a little movements and constant breathing frequency, spontaneous breathing |
| 40 | [91] | RR  | Self-record        | 12  | -  | -  | 28.75±4.5  | Healthy | -                                                                           | Indoor | RGB      | IDS UI-3160CP                                                            | 1920X1080          | 120   | -                                                      | -                         | Chest signal                         | Subject lying in supine position                                                          |
| 41 | [92] | HRV | Self-record        | 11  | -  | -  | 22±2       | Healthy | Fitz scale: II to IV                                                        | Indoor | RGB      | Imaging source DFL-23UM021                                               | -                  | 115   | -                                                      | 40 cm                     | ECG, blood volume pulse sensor, skin | Rest, placing the right hand in cold water                                                |

|    |       |                      |             |    |    |    |                 |                 |                                           |                    |              |                                                                                        |                       |          |                                                     |             |                                                                                        |                                                                                                                    |
|----|-------|----------------------|-------------|----|----|----|-----------------|-----------------|-------------------------------------------|--------------------|--------------|----------------------------------------------------------------------------------------|-----------------------|----------|-----------------------------------------------------|-------------|----------------------------------------------------------------------------------------|--------------------------------------------------------------------------------------------------------------------|
|    |       |                      |             |    |    |    |                 |                 |                                           |                    |              |                                                                                        |                       |          |                                                     |             | conductance and respiration sensor                                                     |                                                                                                                    |
| 42 | [93]  | HRV                  | Self-record | 5  | -  | -  | 28.6±2.3        | Healthy         | -                                         | Indoor             | RGB, NIR     | NIR: Point Grey Grasshopper GS3-U3-2356M-C; RGB: Point Grey Grasshopper GS3-U3-2356C-C | 1184X1200 ; 592X600   | 50       | Red LED brick light, infra-red LED brick light      | 1.8 m       | Philips IntelliVue MX700                                                               | Lying in a bed in supine position                                                                                  |
| 43 | [94]  | HR, RR, BT           | Self-record | 5  | -  | -  | -               | -               | -                                         | Indoor             | Thermal      | Optrics PI-450 thermal imager                                                          | 382X288               | 27       | -                                                   | 1.5 m       | Pulse oximeter, manual counting, average value of the forehead region in thermal image | Sitting with movements (head up and down, forward and backward, turning right and left)                            |
| 44 | [95]  | HR, HRV              | Self-record | 15 | 12 | 3  | 23-35           | Healthy         | Fair skin                                 | Indoor             | RGB          | GoPro HERO3 silver edition, Logitech HD Pro Webcam C910                                | 1280X720, 1920X1080   | 60; 15   | Sunlight                                            | 0.3 m       | Pulse oximeter                                                                         | Sit still, lateral and forward/backward movements                                                                  |
| 45 | [97]  | HR                   | Self-record | 3  | -  | -  | -               | Healthy         | -                                         | -                  | RGB          | -                                                                                      | -                     | 30       | -                                                   | -           | Pulse monitoring device                                                                | Normal rest, can talk to acquisition team                                                                          |
| 46 | [98]  | HR                   | Self-record | 5  | -  | -  | 13-25 days      | Infants         | China                                     | Indoor             | RGB          | Fluke TiX580                                                                           | 640X480               | 9        | -                                                   | 0.25-0.36 m | ECG                                                                                    | Infants lying in bed                                                                                               |
| 47 | [99]  | HR, RR               | Self-record | 30 | 18 | 12 | 27.6-36.4 weeks | Preterm infants | White British, Asian, Black, mixed        | Indoor             | RGB          | JAI 3-CCD AT-200CL digital video camera                                                | 1620X1236             | 20       | Ambient light                                       | -           | Philips IntelliVue MX800 patient monitor                                               | Preterm infants lying in incubator bed                                                                             |
| 48 | [100] | RR, BST              | Self-record | 26 | -  | -  | -               | ICU patients    | -                                         | Indoor             | Thermal      | Optris PI450i                                                                          | 382X288               | 4        | -                                                   | -           | Philips patient monitor                                                                | Lying in bed                                                                                                       |
| 49 | [101] | HR, SpO <sub>2</sub> | Self-record | 28 | -  | -  | 0.6-4.7 days    | Healthy infants | Fitz scale: I-VI                          | Indoor             | RGB          | Logitech C920                                                                          | -                     | 30       | Ambient Fluorescent lamp                            | -           | Pulse oximeter                                                                         | Infant lying in bed                                                                                                |
| 50 | [102] | HR, RR               | Self-record | 10 | -  | -  | 2 to 95 days    | Preterm infants | -                                         | Indoor             | RGB          | Nikon D610, D5300                                                                      | 1920X1080             | 30       | Ambient fluorescent light                           | 1-2 m       | Philips IntelliVue monitor                                                             | Infants lying in bed                                                                                               |
| 51 | [104] | HRV                  | Self-record | 30 | -  | -  | 24-39           | -               | Light yellow skin, dark brown, white skin | Indoor and outdoor | RGB          | Lenovo Phab Pro2                                                                       | 1920X1080             | 15       | Varying illumination (150, 250, 380, 600, 1000 lux) | 25-50 cm    | ECG                                                                                    | Indoor: sitting in a chair with varying illumination and motion, Outdoor: passengers in a driving car, coffee shop |
| 52 | [105] | RR                   | Self-record | 12 | 6  | 6  | 24±4            | Healthy         | -                                         | Indoor             | RGB          | CCD RGB webcam                                                                         | 1280X720              | 30       | Neon light, light through window                    | 1.2 m       | Different digital pressure sensor, SDP610 Sensirion                                    | Sitting and breathing spontaneously                                                                                |
| 53 | [106] | HR, RR               | Self-record | 9  | 9  | 0  | Mean 23.6       | Healthy         | -                                         | Indoor             | RGB, Thermal | Imaging source DFK 23U618, FLIR A315,                                                  | 640X480, 320X240      | 15       | -                                                   | 1 m         | ECG, Respiratory belt                                                                  | Standing, sitting with movement                                                                                    |
| 54 | [107] | HR                   | Self-record | 40 | 24 | 16 | 18-60           | -               | -                                         | Indoor             | RGB          | Logitech HD                                                                            | 640X480               | 30       | Fluorescent lamp                                    | 50 cm       | ECG                                                                                    | Static and dynamic                                                                                                 |
| 55 | [108] | HR, RR               | Self-record | 9  | -  | -  | GA: 25-40 weeks | Preterm infants | -                                         | Indoor             | RGB          | Digital camera                                                                         | 1920X1080 or 1280X720 | 24 or 30 | Sunlight through windows and fluorescent lamps      | 50 cm       | Dräger NICU monitor                                                                    | Infants in the incubator bed                                                                                       |

|    |       |          |             |                                 |    |    |                                        |         |                            |         |                |                                                                                                     |                                              |                             |                                                    |          |                                                      |                                                                                                                                 |
|----|-------|----------|-------------|---------------------------------|----|----|----------------------------------------|---------|----------------------------|---------|----------------|-----------------------------------------------------------------------------------------------------|----------------------------------------------|-----------------------------|----------------------------------------------------|----------|------------------------------------------------------|---------------------------------------------------------------------------------------------------------------------------------|
| 56 | [109] | HR       | Self-record | 19                              | 6  | 13 | -                                      | Infants | India                      | In-door | RGB, NIR, LWIR | NIR: Grasshopper 3 GS3-U3-23S6M-C; RGB: GS3-U3-23S6C-C; LWIR: Gobi-640-GigE, Vari-oCAM HD head 820S | RGB & NIR:1920X1200, LWIR: 640X480, 1024X768 | RGB & NIR: 25, LWIR: 25, 30 | NIR LEDs, ambient lights, sunlight, radiant warmer | 70 cm    | Pulse oximeter                                       | Infants lying in bed                                                                                                            |
| 57 | [110] | HR       | Self-record | 10                              | 5  | 5  | 20-35                                  | Healthy | Fitz scale I-VI            | In-door | RGB            | Nikon AF-S                                                                                          | -                                            | 70                          | Florescent light                                   | 2 m      | Pulse oximeter                                       | Subject underwent two discrete episodes of hypoxia                                                                              |
| 58 | [111] | HR, PTT  | Self-record | 12                              | 6  | 6  | 20-37                                  | Healthy | Fitz scale: I-VI           | In-door | RGB            | Logitech HD pro C920                                                                                | 640X480                                      | 30                          | Fluorescent light                                  | 40-60 cm | ECG, finger PPG                                      | Sit still                                                                                                                       |
| 59 | [112] | HR       | Self-record | 15                              | 10 | 5  | 20-30                                  | -       | Yellow skin                | In-door | RGB            | ELP-USB30W04MTR L21                                                                                 | 640X480                                      | 30                          | Fluorescent lamp                                   | 2 m      | Contact based HR monitor                             | Sit still or exercise gently                                                                                                    |
| 60 | [113] | BP       | Self-record | 100                             | 70 | 30 | 22-50                                  | Healthy | Asian                      | In-door | RGB            | CCD camera                                                                                          | 640X480                                      | 20                          | Normal day light of 150 lux                        | 60 cm    | Electronic sphygmomanometer                          | Stay still                                                                                                                      |
| 61 | [114] | HR       | Self-record | 40                              | 28 | 12 | 22-35                                  | Healthy | China                      | In-door | RGB            | Nikon CoolPix L610                                                                                  | 600X800                                      | 30                          | Ambient light                                      | -        | Pulse oximeter                                       | Sitting with slight movement                                                                                                    |
| 62 | [115] | HR       | Self-record | Lab:5 Home: 87, Panic attack: 9 | -  | -  | Lab; 18-35, Home: 18-65, Panic : 19-34 | -       | -                          | In-door | RGB            | iPhone                                                                                              | -                                            | -                           | -                                                  | -        | ECC, manual palpation                                | Before and after physical activity, panic attack                                                                                |
| 63 | [116] | HR       | Self-record | 9                               | 4  | 5  | 21-25                                  | Healthy | -                          | In-door | RGB            | HP laptop webcam Pavillion DM4/ Samsung Galaxy s4                                                   | Laptop: 340X480 / Smart phone: 1920X1080     | 30 / 30                     | Ambient light through a window, fluorescent lamp   | 1m       | Biopac ECG, piezo resistive sensor                   | Stand still, lateral and frontal movements, breathing maneuvers (spontaneous breathing, Metro-nome breathing, Forced breathing) |
| 64 | [118] | IBI, HRV | Self-record | 9                               | 8  | 1  | 20s-60s                                | -       | -                          | In-door | RGB            | RGB-NIR sensor                                                                                      | 640X480                                      | 300                         | KINOFLO lights, NIR lights                         | 1.5 m    | cPPG sensor                                          | Relax, exercise-hand grip exercise, relax                                                                                       |
| 65 | [119] | BP       | Self-record | 4                               | 4  | 0  | 22-25                                  | Healthy | -                          | In-door | RGB            | High speed camera MEMRECAM Q1m                                                                      | 1280X1024                                    | 500                         | Artificial solar lamp                              | -        | Sphygmomanometer, ECG, PPG                           | High intensity (squat) exercise                                                                                                 |
| 66 | [120] | HR, HRV  | Self-record | 25                              | 17 | 8  | 18-34                                  | Healthy | Fitz scale: I, II, III, IV | In-door | RGB            | Scout sCA640-120gc                                                                                  | 658X492                                      | 120                         | Solux bulbs                                        | 1.5 m    | Pulse oximeter, ECG                                  | Stay still, head movements                                                                                                      |
| 67 | [121] | HR       | MoLi-ppg1   | 30                              | -  | -  | 18-35                                  | -       | -                          | In-door | RGB            | Logitech C920, Logitech C270, Canon LEGRIA HF40                                                     | webcam: 800X600 or 1280X720; HD: 1920X1080   | Webcam: 25, HD: 50          | Fluorescent lamp                                   | 1 m      | Contact PPG                                          | Static, movements, recovery after exercise                                                                                      |
|    |       |          | MoLi-ppg2   | 15                              | -  | -  | -                                      | -       | -                          |         | RGB            | Webcam canyon 720p, HD video camera Panasonic                                                       | -                                            | -                           | -                                                  | -        | -                                                    | Static, speech, recovery after exercise                                                                                         |
|    |       |          | UBFC-rPPG   | 42                              | -  | -  | -                                      | -       | -                          |         | RGB            | Logitech C920HD Pro                                                                                 | 640X480                                      | 30                          | Varying indoor light and sunlight                  | 1 m      | Pulse oximeter                                       | Mathematical game                                                                                                               |
| 68 | [122] | HR, BP   | Self-record | 15                              | -  | -  | 20-38                                  | Healthy | -                          | In-door | RGB            | Google android tablet                                                                               | 1920X1080                                    | 15                          | Uniform white light                                | 30-45 cm | Oscillometric BP and HR monitor, finger pulse sensor | Climbing stairs activity                                                                                                        |

|    |       |            |             |                           |                       |                        |                                 |                                    |         |                   |              |                                        |                                  |       |                                            |                  |                                                                         |                                                                                                                         |
|----|-------|------------|-------------|---------------------------|-----------------------|------------------------|---------------------------------|------------------------------------|---------|-------------------|--------------|----------------------------------------|----------------------------------|-------|--------------------------------------------|------------------|-------------------------------------------------------------------------|-------------------------------------------------------------------------------------------------------------------------|
| 69 | [123] | BP         | Self-record | 85                        | 55                    | 30                     | 61.6±14.1                       | Healthy                            | Chinese | In-door           | RGB          | iPhone 6s                              | -                                | -     | White LED                                  | 50 cm            | Sphygmomanometer                                                        | Sit still                                                                                                               |
| 70 | [124] | RR         | Self-record | 10                        | -                     | -                      | -                               | Healthy                            | -       | In-door           | RGB          | Point Grey Flea 3 GigE                 | 648X488                          | -     | -                                          | -                | Polysomnography                                                         | Lying in bed                                                                                                            |
| 71 | [125] | RR         | Self-record | 40                        | 19                    | 21                     | 34.1±12                         | -                                  | -       | In-door           | Thermal      | FLIR SC3000                            | 320X240                          | 30    | -                                          | 120 cm           | Subject finger flexion (upward and downward) in video                   | Subjects asked to breathe through a nose                                                                                |
| 72 | [126] | BP         | Self-record | 8                         | 7                     | 1                      | 22.4±2.7                        | Healthy                            | -       | In-door           | RGB, thermal | iphone 7, Nippon TVS-200EX             | RGB:1920 X1080, Thermal: 320X240 | 30,1  | Bright (900-1000 lux)                      | 50 cm, 60 cm     | Finometer Model-2, Blood pressure cuff                                  | Rest state with cold press test                                                                                         |
| 73 | [127] | BST        | Self-record | 50                        | Fever: 9; Healthy: 12 | Fever: 16; Healthy: 13 | 43+/-18 fever; 32+/-19 healthy, | Healthy, fever                     | -       | In-door           | Thermal      | Thermopile array                       | 48X47                            | 6     | -                                          | 30-50 cm         | pulse sensor, 24-GHz microwave radar, Contact type clinical thermometer | Sit steady                                                                                                              |
| 74 | [128] | RR         | Self-record | 107                       | 42                    | 59                     | 58.5±15.8                       | Post-surgical patients             | -       | In-door           | FIR          | FLIR T450sc                            | -                                | 30    | -                                          | 1 m              | GE healthcare patient monitor, Visual inspection                        | Lying in bed                                                                                                            |
| 75 | [129] | HR         | Self-record | 2                         | -                     | -                      | -                               | -                                  | -       | In-door           | RGB          | -                                      | -                                | 30    | Natural light                              | -                | Polar H10                                                               | Exercise on treadmill                                                                                                   |
| 76 | [130] | HR         | Self-record | 25                        | 18                    | 7                      | 20-28                           | -                                  | -       | In-door           | RGB          | Surface 4 tablet                       | 1920X1080                        | 29.97 | Dynamic light - 150 lux, 300 lux light     | -                | Polar H7 monitor                                                        | stationary, rotation action (roll), mixed action (yaw, pitch, scaling and translation) and 4 ft walk towards the camera |
| 77 | [131] | HR, RR, BT | Self-record | 22 healthy; 41 influenzas | -                     | -                      | 23.4 healthy, 45.0 influenza    | Healthy, influenza                 | -       | In-door           | RGB, thermal | RGB camera DFK23U618, FLIR A315        | RGB: 640X480; Thermal: 320X240   | 15    | -                                          | 1 m              | ECG, Pulse oximeter, Respiratory effort belt, clinical thermometer      | Standing                                                                                                                |
| 78 | [132] | HR, BST    | Self-record | HR: 7; BST: 4             | -                     | -                      | -                               | -                                  | -       | In-door           | RGB, thermal | Logic C920, FLIR Lepton thermal camera | -                                | -     | -                                          | 30-60 cm         | Thermometer, Polar H7 HR band                                           | Sitting and slightly talking or movement                                                                                |
| 79 | [151] | HR         | Self-record | 15                        | 8                     | 7                      | 30.6±3.7                        | Healthy                            | -       | In-door           | RGB          | Webcam                                 | 640X480                          | 30    | -                                          | -                | ECG                                                                     | Computer based psychological test, doctor game, two interactive web calls                                               |
| 80 | [152] | RR         | Self-record | 28                        | 4                     | 24                     | Inter-quartile range 51-77      | Post-Anesthesia Care Unit Patients | -       | In-door           | LWIR         | Infratec Variocam HD head              | 1024X768                         | 30    | -                                          | -                | Philips IntelliVue MP30 monitor                                         | Lying in bed                                                                                                            |
| 81 | [153] | HR         | Self-record | 10                        | -                     | -                      | -                               | -                                  | -       | Out-door          | RGB          | Go-Pro HERO 3+                         | 1920X1080                        | 30    | -                                          | -                | Transmissive pulse oximeter                                             | Driving                                                                                                                 |
| 82 | [154] | HR         | Self-record | 6                         | 3                     | 3                      | -                               | Healthy                            | -       | In-door           | RGB          | Chicony USB 2.0 camera webcam          | 640X480                          | 29.97 | Fluorescent lamps and natural light        | 35-60 cm         | Pulse oximeter                                                          | head to camera, head side to camera                                                                                     |
| 83 | [156] | HR         | Self-record | 100                       | 90                    | 10                     | 20-55                           | Healthy                            | -       | In-door, Out-door | RGB, NIR     | Kinect 2.0                             | RGB: 1920*1080; NIR: 512*424     | 15    | Dark environment with NIR light (0-80 lux) | 60 cm (40-80 cm) | Finger pulse oximeter                                                   | Stay still, Strenuous exercise, multiple subjects, driving                                                              |
| 84 | [157] | HR         | MAHNOB-HCI  | 27                        | 12                    | 15                     | 19-40                           | -                                  | -       | In-door           | RGB          | Allied Vision Sting-ray F-046C         | 780X580                          | 61    | -                                          | 40 cm            | ECG                                                                     | Emotion elicitation and implicit tagging                                                                                |

|     |       |     |             |      |    |    |          |                                                  |                                                                                       |                   |              |                                  |              |     |                                                |           |                                        |                                                                                 |
|-----|-------|-----|-------------|------|----|----|----------|--------------------------------------------------|---------------------------------------------------------------------------------------|-------------------|--------------|----------------------------------|--------------|-----|------------------------------------------------|-----------|----------------------------------------|---------------------------------------------------------------------------------|
|     |       |     | Self-record | 19   | -  | -  | 20s-30s  | -                                                | Middle east Asia and Asia                                                             | Out-door          | RGB          | GoPro HERO3+                     | 1920X1080    | 30  | -                                              | -         | Contact based pulse sensor             | Driving condition                                                               |
| 85  | [158] | HR  | Self-record | 10   | -  | -  | -        | -                                                | -                                                                                     | In-door           | RGB          | Microsoft Kinect 2.0             | 1920X1080    | 21  | -                                              | 0.5-2.5 m | Pulse oximeter                         | varying distance with different angle                                           |
| 86  | [159] | HR  | Self-record | 4    | -  | -  | -        | -                                                | -                                                                                     | In-door           | RGB          | Macbook air                      | 480p         | 30  | -                                              | -         | PPG signals at the pointing finger     | Remain still                                                                    |
| 87  | [160] | HR  | Self-record | 9    | -  | -  | -        | -                                                | -                                                                                     | In-door           | RGB          | Intel RealSense D435             | 640X480      | 30  | Working space light                            | -         | SpO <sub>2</sub> sensor                | Sitting posture with slight movement                                            |
| 88  | [163] | HR  | OBF         | 100  | 61 | 39 | 31.6±8.8 | Healthy                                          | Caucasian Asian, others                                                               | In-door           | RGB          | Blackmagic URFA mini             | 1920X2080    | 60  | LED light                                      | 1 m       | ECG                                    | Resting state, post exercise state                                              |
|     |       |     | MAHNOB-HCI  | 27   | 12 | 15 | 19-40    | -                                                | -                                                                                     | In-door           | RGB          | Allied Vision Sting-ray F-046C   | 780X580      | 61  | -                                              | 40 cm     | ECG                                    | Facial expression and voluntary head motion                                     |
| 89  | [164] | HRV | Self-record | 16   | 9  | 7  | -        | -                                                | Light, dark skin                                                                      | In-door           | RGB          | Blackfly BFLY-U3-2356C           | -            | 30  | Ambient, LED arrays, laptop screen light       | -         | Pulse oximeter                         | stay still, reading, watching, talking, deep breath                             |
| 90  | [165] | HR  | Self-record | 11   | 7  | 4  | 22-32    | Healthy                                          | -                                                                                     | In-door, out-door | RGB          | FLIR BFLY-U3-2356C-C             | 960*600      | 30  | ambient and fluorescent light                  | 1.5 m     | Finger blood volume pulse sensor       | Sitting, Standing, Running(tread-mill)                                          |
| 91  | [166] | RR  | Self-record | 20   | 16 | 4  | 20-38    | -                                                | -                                                                                     | In-door           | RGB, thermal | Thermal imager MAG62, RGB camera | RGB: 640X480 | 10  | -                                              | -         | Sleep respirator monitor               | Sitting with movements                                                          |
| 92  | [167] | HR  | Self-record | 8    | -  | -  | -        | -                                                | -                                                                                     | In-door           | RGB          | Logitech c270                    | -            | -   | -                                              | -         | Pulse oximeter                         | Sit quietly, shake their heads normally, daily interactions (e.g., talk, smile) |
| 93  | [172] | BP  | Self-record | 1328 | -  | -  | 18-87    | Arrhythmia, Diabetes, Hypertension, Lung disease | East asian, white, south asian, middle eastern, black, hispanic/latino, mixed/unknown | In-door           | RGB          | iPhone 6 plus                    | 720p         | 30  | LED                                            | 40-60 cm  | CNAP Monitor 500                       | Sitting comfortably                                                             |
| 94  | [173] | HR  | Self-record | 1    | 1  | 0  | -        | Healthy                                          | Asian                                                                                 | In-door           | RGB          | 18-bit camera (Xviii: VIEW-Plus) | -            | 30  | Varying (5-300 lux)                            | 1 m       | ECG poly-graph                         | Face was fixed using chin rest                                                  |
| 95  | [178] | HR  | Self-record | 1    | 1  | 0  | -        | -                                                | -                                                                                     | In-door           | RGB          | -                                | -            | 25  | -                                              | 80 cm     | Finger pulse oximeter                  | Sit still                                                                       |
| 96  | [182] | HR  | Self-record | -    | -  | -  | -        | -                                                | -                                                                                     | -                 | RGB          | Logitech C922                    | 640X480      | 30  | -                                              | -         | Pulse oximeter                         | -                                                                               |
| 97  | [184] | RR  | Self-record | 30   | 30 | 0  | -        | Healthy                                          | -                                                                                     | In-door           | RGB          | IDS uEye-2220                    | -            | 20  | Regular office light                           | 1.5 m     | Capnography, visual inspection         | Sitting quietly with varying respiratory frequency and cloth                    |
| 98  | [185] | RR  | Self-record | 9    | 5  | 4  | 25-32    | -                                                | -                                                                                     | In-door           | RGB          | Galaxy S9+                       | 1920X1080    | 240 | Stable amount of light                         | 0.6 m     | Manual counting by observing the torso | Lying in bed on the side and regular breathing                                  |
| 99  | [187] | HR  | Self-record | 11   | -  | -  | 22-24    | -                                                | -                                                                                     | In-door           | RGB & NIR    | JAI AD-130GE                     | 1296X966     | 30  | Varying illumination (0.4 lux, 1 lux, 600 lux) | -         | Pulse oximeter                         | Sit still                                                                       |
| 100 | [188] | HR  | Self-record | 5    | -  | -  | -        | -                                                | -                                                                                     | In-door           | RGB          | Kinect 2 somatosensory camera    | -            | 15  | Strong, natural, dark light                    | 0.5,1,2m  | Pulse touching                         | Standing                                                                        |

|     |       |    |             |    |   |   |       |   |                                 |         |     |                    |          |    |                                  |          |                                |                                                   |
|-----|-------|----|-------------|----|---|---|-------|---|---------------------------------|---------|-----|--------------------|----------|----|----------------------------------|----------|--------------------------------|---------------------------------------------------|
| 101 | [189] | HR | Self-record | 11 | 5 | 6 | -     | - | -                               | In-door | RGB | webcam             | 1280X720 | 15 | Different lighting               | 30-40 cm | Pulse oximeter                 | Rest and different activities                     |
| 102 | [190] | HR | Self-record | 9  | - | - | -     | - | -                               | In-door | RGB | iPhone 6s          | -        | -  | Fluorescence light and day-light | -        | ECG- based chest belt Polar H7 | Treadmill exercise or elliptical machine exercise |
| 103 | [191] | HR | Self-record | 30 | - | - | -     | - | -                               | In-door | RGB | Webcam             | 640X480  | 30 | Ambient light                    | 0.5 m    | ECG Biocare ECG-2000           | Sitting with illumination variations              |
| 104 | [197] | HR | Self-record | 11 | 9 | 2 | 30±10 | - | Caucasian, black african, asian | In-door | RGB | Dell XPS 15 laptop | 720p     | 30 | Ambient light                    | -        | wrist worn contact PPG sensor  | Stationary and varying illumination               |
